# Supplementary material for: Extensive Association of Common Disease Variants with Regulatory Sequence
Source: PLoS One. 2016 Nov 22;11(11):e0165893. doi: 10.1371/journal.pone.0165893 (PMC5119736; doi:10.1371/journal.pone.0165893)
Supplement: S1 Table — (XLS) [file pone.0165893.s005.xls]

## Sheet: GWAS studies used
name	PUBMEDID	First Author	Date	Journal	Study
Myopia	23049088	Meng W	2012-10-09	Invest Ophthalmol Vis Sci	A genome-wide association study provides evidence for association of chromosome 8p23 (MYP10) and 10q21.1 (MYP15) with high myopia in the French Population.
Age at menarche	21102462	Elks CE	2010-11-21	Nat Genet	Thirty new loci for age at menarche identified by a meta-analysis of genome-wide association studies.
Body mass index 1	20935630	Speliotes EK	2010-10-10	Nat Genet	Association analyses of 249,796 individuals reveal 18 new loci associated with body mass index.
Cytokine responses to smallpox vaccine	22610502	Kennedy RB	2012-05-19	Hum Genet	Genome-wide analysis of polymorphisms associated with cytokine responses in smallpox vaccine recipients.
C-reactive protein levels	21300955	Dehghan A	2011-02-07	Circulation	Meta-analysis of genome-wide association studies in &gt;80 000 subjects identifies multiple loci for C-reactive protein levels.
phospho- and sphingolipid concentrations	22359512	Demirkan A	2012-02-16	PLoS Genet	Genome-wide association study identifies novel loci associated with circulating phospho- and sphingolipid concentrations.
Refractive error and myopia	23396134	Verhoeven VJ	2013-02-10	Nat Genet	Genome-wide meta-analyses of multiancestry cohorts identify multiple new susceptibility loci for refractive error and myopia.
Bone mineral density 3	24249740	Zhang L	2013-11-17	Hum Mol Genet	Multistage genome-wide association meta-analyses identified two new loci for bone mineral density.
Bone mineral density 4	24945404	Kemp JP	2014-06-19	PLoS Genet	Phenotypic dissection of bone mineral density reveals skeletal site specificity and facilitates the identification of novel loci in the genetic regulation of bone mass attainment.
Five major psychiatric disorders	23453885	Smoller JW	2013-02-27	Lancet	Identification of risk loci with shared effects on five major psychiatric disorders: a genome-wide analysis.
Bone mineral density 1	19801982	Rivadeneira F	2009-10-04	Nat Genet	Twenty bone-mineral-density loci identified by large-scale meta-analysis of genome-wide association studies.
Childhood obesity	23251661	Comuzzie AG	2012-12-04	PLoS One	Novel genetic loci identified for the pathophysiology of childhood obesity in the Hispanic population.
Metabolic syndrome traits	22399527	Kristiansson K	2012-03-07	Circ Cardiovasc Genet	Genome-wide screen for metabolic syndrome susceptibility Loci reveals strong lipid gene contribution but no evidence for common genetic basis for clustering of metabolic syndrome traits.
Blood metabolites 1	21886157	Suhre K	2011-08-31	Nature	Human metabolic individuality in biomedical and pharmaceutical research.
Body mass index 3	24861553	Wen W	2014-05-26	Hum Mol Genet	Meta-analysis of genome-wide association studies in East Asian-ancestry populations identifies four new loci for body mass index.
Schizophrenia	23974872	Ripke S	2013-08-25	Nat Genet	Genome-wide association analysis identifies 13 new risk loci for schizophrenia.
Metabolic traits 1	19060910	Sabatti C	2008-12-07	Nat Genet	Genome-wide association analysis of metabolic traits in a birth cohort from a founder population.
Body mass index 2	22581228	Manning AK	2012-05-13	Nat Genet	A genome-wide approach accounting for body mass index identifies genetic variants influencing fasting glycemic traits and insulin resistance.
Crohns disease 3	22412388	Kenny EE	2012-03-08	PLoS Genet	A genome-wide scan of Ashkenazi Jewish Crohn's disease suggests novel susceptibility loci.
Fasting glucose and Type 2 diabetes	20081858	Dupuis J	2010-01-17	Nat Genet	New genetic loci implicated in fasting glucose homeostasis and their impact on type 2 diabetes risk.
Blood metabolites 2	24816252	Shin SY	2014-05-11	Nat Genet	An atlas of genetic influences on human blood metabolites.
Lipid levels 3	19060911	Aulchenko YS	2008-12-07	Nat Genet	Loci influencing lipid levels and coronary heart disease risk in 16 European population cohorts.
Sudden cardiac arrest	21658281	Aouizerat BE	2011-06-10	BMC Cardiovasc Disord	GWAS for discovery and replication of genetic loci associated with sudden cardiac arrest in patients with coronary artery disease.
Plasma homocysteine concentrations	23824729	van Meurs JB	2013-07-03	Am J Clin Nutr	Common genetic loci influencing plasma homocysteine concentrations and their effect on risk of coronary artery disease.
Stroke and coronary artery disease	24262325	Dichgans M	2013-11-21	Stroke	Shared genetic susceptibility to ischemic stroke and coronary artery disease: a genome-wide analysis of common variants.
Prostate cancer susceptibility 2	19767753	Eeles RA	2009-09-20	Nat Genet	Identification of seven new prostate cancer susceptibility loci through a genome-wide association study.
Thyroid-related traits	23408906	Porcu E	2013-02-07	PLoS Genet	A meta-analysis of thyroid-related traits reveals novel loci and gender-specific differences in the regulation of thyroid function.
Primary tooth eruption	23704328	Fatemifar G	2013-05-23	Hum Mol Genet	Genome-wide association study of primary tooth eruption identifies pleiotropic loci associated with height and craniofacial distances.
Polygenic dyslipidemia	19060906	Kathiresan S	2008-12-07	Nat Genet	Common variants at 30 loci contribute to polygenic dyslipidemia.
Cardiovascular-related traits	21943158	Middelberg RP	2011-09-24	BMC Med Genet	Genetic variants in LPL, OASL and TOMM40/APOE-C1-C2-C4 genes are associated with multiple cardiovascular-related traits.
Atherosclerosis	22916037	Inouye M	2012-08-16	PLoS Genet	Novel Loci for metabolic networks and multi-tissue expression studies reveal genes for atherosclerosis.
Migraine	23793025	Anttila V	2013-06-23	Nat Genet	Genome-wide meta-analysis identifies new susceptibility loci for migraine.
Platelet count and volume	24026423	Shameer K	2013-09-12	Hum Genet	A genome- and phenome-wide association study to identify genetic variants influencing platelet count and volume and their pleiotropic effects.
Testicular cancer	23666240	Ruark E	2013-05-12	Nat Genet	Identification of nine new susceptibility loci for testicular cancer, including variants near DAZL and PRDM14.
Kidney function	20383146	Kottgen A	2010-04-11	Nat Genet	New loci associated with kidney function and chronic kidney disease.
Kidney function-related traits	22797727	Okada Y	2012-07-15	Nat Genet	Meta-analysis identifies multiple loci associated with kidney function-related traits in east Asian populations.
Cognitive decline in Alzheimers disease	23535033	Sherva R	2013-03-24	Alzheimers Dement	Genome-wide association study of the rate of cognitive decline in Alzheimer's disease.
Lipid levels 1	18193043	Willer CJ	2008-01-13	Nat Genet	Newly identified loci that influence lipid concentrations and risk of coronary artery disease.
Lipid levels 2	18193044	Kathiresan S	2008-01-13	Nat Genet	Six new loci associated with blood low-density lipoprotein cholesterol, high-density lipoprotein cholesterol or triglycerides in humans.
Height 2	18391952	Weedon MN	2008-04-06	Nat Genet	Genome-wide association analysis identifies 20 loci that influence adult height.
Mean arterial pressure	21909110	Wain LV	2011-09-11	Nat Genet	Genome-wide association study identifies six new loci influencing pulse pressure and mean arterial pressure.
N-glycosylation of immunoglobulin G	23382691	Lauc G	2013-01-31	PLoS Genet	Loci associated with N-glycosylation of human immunoglobulin G show pleiotropy with autoimmune diseases and haematological cancers.
Heart rate	23583979	den Hoed M	2013-04-14	Nat Genet	Identification of heart rate-associated loci and their effects on cardiac conduction and rhythm disorders.
Age at menopause	22267201	Stolk L	2012-01-22	Nat Genet	Meta-analyses identify 13 loci associated with age at menopause and highlight DNA repair and immune pathways.
Lung function	21946350	Soler Artigas M	2011-09-25	Nat Genet	Genome-wide association and large-scale follow up identifies 16 new loci influencing lung function.
Prostate cancer susceptibility	23535732	Eeles RA	2013-04-01	Nat Genet	Identification of 23 new prostate cancer susceptibility loci using the iCOGS custom genotyping array.
Vitiligo	22561518	Jin Y	2012-05-06	Nat Genet	Genome-wide association analyses identify 13 new susceptibility loci for generalized vitiligo.
Fibrinogen	23969696	Sabater-Lleal M	2013-08-22	Circulation	Multiethnic meta-analysis of genome-wide association studies in &gt;100 000 subjects identifies 23 fibrinogen-associated Loci but no strong evidence of a causal association between circulating fibrinogen and cardiovascular disease.
Plasma lipoproteins	19936222	Chasman DI	2009-11-20	PLoS Genet	Forty-three loci associated with plasma lipoprotein size, concentration, and cholesterol content in genome-wide analysis.
Alzheimers disease	24162737	EADI	2013-10-27	Nat Genet	Meta-analysis of 74,046 individuals identifies 11 new susceptibility loci for Alzheimer's disease.
Chronic lymphocytic leukemia 2	24292274	Speedy HE	2013-12-01	Nat Genet	A genome-wide association study identifies multiple susceptibility loci for chronic lymphocytic leukemia.
Pulmonary function	23284291	Hancock DB	2012-12-20	PLoS Genet	Genome-wide joint meta-analysis of SNP and SNP-by-smoking interaction identifies novel loci for pulmonary function.
Type 2 diabetes 2	24509480	Mahajan A	2014-02-09	Nat Genet	Genome-wide trans-ancestry meta-analysis provides insight into the genetic architecture of type 2 diabetes susceptibility.
Blood cell traits	23263863	Li J	2012-12-20	Hum Mol Genet	GWAS of blood cell traits identifies novel associated loci and epistatic interactions in Caucasian and African-American children.
Lipid levels 5	20864672	Waterworth DM	2010-09-23	Arterioscler Thromb Vasc Biol	Genetic variants influencing circulating lipid levels and risk of coronary artery disease.
Serum metabolite levels	22286219	Kettunen J	2012-01-29	Nat Genet	Genome-wide association study identifies multiple loci influencing human serum metabolite levels.
Type 2 diabetes	20581827	Voight BF	2010-06-27	Nat Genet	Twelve type 2 diabetes susceptibility loci identified through large-scale association analysis.
Rheumatoid arthritis	20453842	Stahl EA	2010-05-09	Nat Genet	Genome-wide association study meta-analysis identifies seven new rheumatoid arthritis risk loci.
Blood pressure and cardiovascular risc	21909115	Ehret GB	2011-09-11	Nature	Genetic variants in novel pathways influence blood pressure and cardiovascular disease risk.
Self-reported allergy	23817569	Hinds DA	2013-06-30	Nat Genet	A genome-wide association meta-analysis of self-reported allergy identifies shared and allergy-specific susceptibility loci.
Bone mineral density 2	22504420	Estrada K	2012-04-15	Nat Genet	Genome-wide meta-analysis identifies 56 bone mineral density loci and reveals 14 loci associated with risk of fracture.
Metabolic traits 2	21909109	Kim YJ	2011-09-11	Nat Genet	Large-scale genome-wide association studies in East Asians identify new genetic loci influencing metabolic traits.
Systemic lupus erythematosus 1	19838193	Han JW	2009-10-18	Nat Genet	Genome-wide association study in a Chinese Han population identifies nine new susceptibility loci for systemic lupus erythematosus.
Coronary artery disease	21378990	Schunkert H	2011-03-06	Nat Genet	Large-scale association analysis identifies 13 new susceptibility loci for coronary artery disease.
Hematological parameters	19820697	Soranzo N	2009-10-11	Nat Genet	A genome-wide meta-analysis identifies 22 loci associated with eight hematological parameters in the HaemGen consortium.
Skeletal frame size	19343178	Soranzo N	2009-04-03	PLoS Genet	Meta-analysis of genome-wide scans for human adult stature identifies novel Loci and associations with measures of skeletal frame size.
Height 1	18391951	Gudbjartsson DF	2008-04-06	Nat Genet	Many sequence variants affecting diversity of adult human height.
Serum urate concentrations	23263486	Kottgen A	2012-12-23	Nat Genet	Genome-wide association analyses identify 18 new loci associated with serum urate concentrations.
Megakaryopoiesis and platelet formation	22139419	Gieger C	2011-11-30	Nature	New gene functions in megakaryopoiesis and platelet formation.
Erythrocyte phenotypes	19862010	Ganesh SK	2009-10-11	Nat Genet	Multiple loci influence erythrocyte phenotypes in the CHARGE Consortium.
Chronic lymphocytic leukemia 1	23770605	Berndt SI	2013-06-16	Nat Genet	Genome-wide association study identifies multiple risk loci for chronic lymphocytic leukemia.
Human red blood cell	23222517	van der Harst P	2012-12-05	Nature	Seventy-five genetic loci influencing the human red blood cell.
Anthropometric traits	23563607	Berndt SI	2013-04-07	Nat Genet	Genome-wide meta-analysis identifies 11 new loci for anthropometric traits and provides insights into genetic architecture.
Colorectal cancer	24836286	Zhang B	2014-05-18	Nat Genet	Large-scale genetic study in East Asians identifies six new loci associated with colorectal cancer risk.
Rheumatoid arthritis 2	24390342	Okada Y	2013-12-25	Nature	Genetics of rheumatoid arthritis contributes to biology and drug discovery.
Lipid levels 6	24097068	Willer CJ	2013-10-06	Nat Genet	Discovery and refinement of loci associated with lipid levels.
Breast cancer risk	23535729	Michailidou K	2013-04-01	Nat Genet	Large-scale genotyping identifies 41 new loci associated with breast cancer risk.
Macular degeneration	23455636	Fritsche LG	2013-03-03	Nat Genet	Seven new loci associated with age-related macular degeneration.
Central corneal thickness and keratoconus	23291589	Lu Y	2013-01-06	Nat Genet	Genome-wide association analyses identify multiple loci associated with central corneal thickness and keratoconus.
Systemic lupus erythematosus 2	23273568	Yang W	2012-12-27	Am J Hum Genet	Meta-analysis followed by replication identifies loci in or near CDKN1B, TET3, CD80, DRAM1, and ARID5B as associated with systemic lupus erythematosus in Asians.
Inflammatory bowel disease	23128233	Jostins L	2012-11-01	Nature	Host-microbe interactions have shaped the genetic architecture of inflammatory bowel disease.
Liver enzymes in plasma	22001757	Chambers JC	2011-10-16	Nat Genet	Genome-wide association study identifies loci influencing concentrations of liver enzymes in plasma.
Multiple sclerosis	21833088	Sawcer S	2011-08-11	Nature	Genetic risk and a primary role for cell-mediated immune mechanisms in multiple sclerosis.
Type 1 diabetes - autoantibody positive	21829393	Plagnol V	2011-08-04	PLoS Genet	Genome-wide association analysis of autoantibody positivity in type 1 diabetes cases.
Biliary cirrhosis	21399635	Mells GF	2011-03-13	Nat Genet	Genome-wide association study identifies 12 new susceptibility loci for primary biliary cirrhosis.
Celiac disease and rheumatoid arthritis	21383967	Zhernakova A	2011-02-24	PLoS Genet	Meta-analysis of genome-wide association studies in celiac disease and rheumatoid arthritis identifies fourteen non-HLA shared loci.
Ulcerative colitis	21297633	Anderson CA	2011-02-06	Nat Genet	Meta-analysis identifies 29 additional ulcerative colitis risk loci, increasing the number of confirmed associations to 47.
Crohns disease 2	21102463	Franke A	2010-11-21	Nat Genet	Genome-wide meta-analysis increases to 71 the number of confirmed Crohn's disease susceptibility loci.
Waist-hip ratio	20935629	Heid IM	2010-10-10	Nat Genet	Meta-analysis identifies 13 new loci associated with waist-hip ratio and reveals sexual dimorphism in the genetic basis of fat distribution.
Height 3	20881960	Lango Allen H	2010-09-29	Nature	Hundreds of variants clustered in genomic loci and biological pathways affect human height.
Lipid levels 4	20686565	Teslovich TM	2010-08-05	Nature	Biological, clinical and population relevance of 95 loci for blood lipids.
Celiac disease	20190752	Dubois PC	2010-02-28	Nat Genet	Multiple common variants for celiac disease influencing immune gene expression.
Type 1 diabetes	19430480	Barrett JC	2009-05-10	Nat Genet	Genome-wide association study and meta-analysis find that over 40 loci affect risk of type 1 diabetes.
Crohns disease 1	18587394	Barrett JC	2008-06-29	Nat Genet	Genome-wide association defines more than 30 distinct susceptibility loci for Crohn's disease.
